# Supplementary material
Source: MDPI journal article supplement (https://www.mdpi.com/2073-4395/8/9/173)
Supplement: s1 [file s1]

**Table S1.** Shoot and root length, no. of leaves, and water content in *A. triphylla* seedlings under different treatment regimes.

| Treatment | Shoot Length (cm) | Root Length (cm) | No. of Leaves | Water Content (%) |
|-----------|-------------------|------------------|---------------|-------------------|
| TA        | 9.4 ± 0.6 a       | 5.3 ± 0.5 a      | 3.2 ± 0.2 a   | 81.7 ± 1.2 a      |
| TB        | 8.8 ± 0.4 a       | 5.4 ± 0.4 a      | 3.3 ± 0.3 a   | 77.1 ± 0.8 a      |
| TC        | 9.6 ± 0.8 a       | 6.3 ± 0.6 a      | 3.0 ± 0.0 a   | 77.9 ± 0.8 a      |

Data is shown as the mean ± standard error ( $n = 3$ ). Different letters in the same column indicate significant differences in measured quantities ( $p < 0.05$ ). TA, 20/20°C (day/night); TB, 25/15°C; TC, 20/15°C.
